14. Servei d'Informació i Estudis. Anàlisi de la mortalitat a Catalunya 2007. Barcelona: departament de Salut, Generalitat de Catalunya, 2008. <http://www.gencat.cat/salut/depsalut/mortalidat2007>.
15. Hurme M, Paavilainen PM, Pertovaara M *et al.* Ig A levels are predictors of mortality in Finnish nonagenarians. *Mech Aging Dev* 2005; 126: 829–31.
16. Nguyen HT, Black SA, Ray LA, Espino DV, Markides KS. Cognitive impairment and mortality in older Mexican Americans. *J Am Geriatr Soc* 2003; 51: 178–83.
17. Andersen K, Nybo H, Gaist D *et al.* Cognitive impairment and mortality among nonagenarians: The Danish 1905 cohort survey. *Dement Geriatr Cogn Disord* 2002; 13: 156–63.
18. Formiga F, Ferrer A, Duaso E, Pujol R. Predictive items of 2-year mortality in nonagenarians with cognitive impairment at baseline: the NonaSantfeliu study. *Arch Gerontol Geriatr* 2009; 48: 254–7.
19. Formiga F, López-Soto A, Sacanella E, Jacob J, Masanés F, Vidal M. Valoración de la capacidad funcional después de un ingreso hospitalario en pacientes nonagenarios. *Med Clin (Barc)* 2000; 115: 695–6.
20. Cacciatore F, Abete P, Maggi S *et al.* Disability and 6-year mortality in elderly population. Role of visual impairment. *Aging Clin Exp Res* 2004; 16: 382–8.
21. Casiglia E, Mazza A, Tikhonoff V, Scarpa R, Schiavon L, Pessina AC. Total cholesterol and mortality in the elderly. *J Intern Med* 2003; 254: 353–62.
22. Hu P, Seeman TE, Harris TB, Reuben DB. Does inflammation or undernutrition explain the low cholesterol-mortality association in high-functioning older persons? MacArthur studies of successful aging. *J Am Geriatr Soc* 2003; 51: 80–4.
23. Formiga F, Chivite D, Manito N, Osma V, Miravet S, Pujol R. One-year follow-up of heart failure patients after their first admission. *QJM* 2004; 97: 81–6.
24. Formiga F, Ferrer A, Pérez-Castejon JM, Pujol R. Community-dwelling nondisabled nonagenarians: two-year follow-up: the NonaSantfeliu Study. *J Am Geriatr Soc* 2007; 55: 801–3.

Received 26 April 2010; accepted in revised form 1 July 2010

*Age and Ageing* 2011; **40**: 116–121  
doi: 10.1093/ageing/afq142  
Published electronically 10 November 2010

© The Author 2010. Published by Oxford University Press on behalf of the British Geriatrics Society.  
All rights reserved. For Permissions, please email: [journals.permissions@oxfordjournals.org](mailto:journals.permissions@oxfordjournals.org)

## Incidence of ischaemic stroke according to income level among older people: the 3C study

OLIVIER GRIMAUD<sup>1</sup>, CAROLE DUFOUIL<sup>2</sup>, ANNICK ALPÉROVITCH<sup>2</sup>, FERNANDO PICO<sup>2</sup>, KAREN RITCHIE<sup>3</sup>, CATHERINE HELMER<sup>4</sup>, CHRISTOPHE TZOURIO<sup>2</sup>, PIERRE CHAUVIN<sup>5</sup>

<sup>1</sup>EHESP—Epidemiology, Avenue du Pr Léon-Bernard, Rennes 35043, France

<sup>2</sup>INSERM—U708, Paris, France

<sup>3</sup>INSERM—U888, Montpellier, France

<sup>4</sup>INSERM—U593, Bordeaux, France

<sup>5</sup>INSERM—U707, Paris, France

Address correspondence to: O. Grimaud. Tel: (+33) 2 99 02 28 34; Fax: (+33) 2 99 02 26 25. Email: [olivier.grimaud@ehesp.fr](mailto:olivier.grimaud@ehesp.fr)

### Abstract

**Background:** stroke has been shown to follow a social gradient with incidence rising as socioeconomic status decreases.

**Objective:** to examine the relationship between socioeconomic status and ischaemic stroke risk amongst older people.

**Setting:** the Cities of Bordeaux, Dijon and Montpellier in France.

**Subjects and methods:** nine thousand and two hundred and ninety-four non-institutionalised persons aged 65 years or more followed for 6 years.

**Results:** the distribution of cardiovascular risks factors was consistent with the classical finding of more favourable risk profiles among the advantaged socioeconomic groups. One hundred and thirty-six individuals developed a first ever ischaemic stroke (incidence rate: 3.2 per 1,000 py (person-years), 95% CI 2.7–3.8). The age- and sex-adjusted incidence of ischaemic stroke increased with increasing level of income (from 2.4 to 4.1 per 1,000 py,  $P = 0.04$ ). In the multivariable analysis adjusting for cardiovascular risk factors, the higher income group displayed a 80% increased risk of ischaemic stroke

compared with less wealthy participants (hazards ratio 1.77, 95% CI 1.20–2.61).

**Conclusions:** in this community-based sample of older individuals, a higher level of household income was associated with a higher risk of ischaemic stroke, a reversal of the social gradient usually reported in younger age groups. Selective survival is one of the potential explanations for this unexpected finding.

**Keywords:** aged, elderly, social class, stroke

## Introduction

Stroke carries a high human, family and societal burden which is unfairly distributed [1, 2]. Like most other diseases, stroke has been shown to follow a social gradient with higher levels of morbidity and mortality associated with lower socioeconomic status (SES) [3, 4]. This pattern held during the 1990s in European countries, whether cerebrovascular disease mortality [5] or stroke prevalence [6] was analysed in relation to education level. Although overall socioeconomic disparities in mortality have been shown to decrease in older age [7], less is known about what happens at the level of specific causes of morbidity and mortality in this age group. In the face of population ageing, the question of health inequalities in older age is critical [8]. Studying stroke in this respect seems particularly pertinent since registries from England, Germany and France have shown that three out of four strokes occur over 65 [9]. In Europe, analysis of stroke mortality according to educational level showed that the intensity of the social gradient decreases with age [10]. Using wealth and income as a socioeconomic indicator, cohort studies from the United States showed a decrease of the social gradient over 65 years in one case [11], and a reversal over 74 years in the other case [12]. Reasons for this phenomenon are not clear and may include a combination of causes and artefacts. It should be noted that former studies did not analyse risk by type of stroke, which might be of interest since ischaemic and haemorrhagic strokes display differing patterns of risk factors and pathological mechanisms. The impact of high blood pressure is significantly more important on haemorrhagic compared with ischaemic strokes [13], whereas there is evidence that *APOE* genotype is associated with haemorrhagic but not with ischaemic stroke [14]. This study therefore explores the association between SES and ischaemic stroke risk using data from the Three-City (3C) study, a cohort of French residents aged 65 years or more established in 1999.

## Methods

The 3C study is an ongoing longitudinal study that aims to evaluate the relation between vascular risk factors and risk of dementia. A detailed account of the study design is available elsewhere [15]. Briefly, between 1999 and 2001, Nine thousand and two hundred and ninety-four non-institutionalised persons aged 65 years and over were enrolled in three French cities (Bordeaux, Dijon and

Montpellier). Administrative districts were selected in the first stage of the sampling procedure. Eligible inhabitants identified by the electoral rolls were invited to participate. Among all persons contacted the acceptance rate was 37%. Baseline data, including household income, alcohol and tobacco consumptions, self-rated health, medical history and medication use, were collected during face to face interviews. Measurements of height, weight, systolic and diastolic blood pressure, and ECG recording were performed during clinical examinations. History of stroke prior to study inclusion was defined as self-report of hospital admission for stroke. At each follow-up examination (2, 4 and 6 years after enrolment), information was collected concerning suspicion of stroke occurrence. An endpoint adjudication committee reviewed source documentation for all individuals with a suspected stroke or for those who died during follow-up. Outcomes were coded according to the tenth revision of the International Classification of Diseases. A stroke was classified as non-fatal if the patient was alive 28 days after stroke onset. One laboratory (University Hospital of Dijon) analysed all blood specimens (consented by 95% of participants) for the determination of parameters such as glycaemia and lipids levels.

Participants were asked to indicate their monthly current household income in one of four categories (<750€, 750–1,500€, 1,500–2,200€, >2,200€). Participants also indicated whether they lived alone, with their partner, or with other relatives. In the latter instance, no further information regarding household composition was sought thus precluding estimation of household income per consumption unit. Instead we repeated analyses on the sub-sample of participants living with a partner (60% of all participants). Education level was categorised as no education (no diploma), intermediate (secondary school) or high (above secondary school). We used standard criteria to define hypertension (SBP >160 mmHg, or DBP >95 mmHg, according to definition used at study onset), diabetes (glycaemia >7 mmol/l, or treatment) and hypercholesterolaemia (serum cholesterol  $\geq$ 6 mmol/l or treatment). Smoking behaviour was classified as non-smoker, former smoker or current smoker. Alcohol consumption was classified in five categories (abstinent, 1–9, 10–19, 20–29 and 30 or more g/day). We dichotomised the five points self-rated health scale as very good and good versus average, bad or very bad.

We first calculated and tested trend in prevalence of risk factors according to income level. We then calculated standardised incidence rates—per 1,000 py (person-years)—by

levels of income, education and for participants living with their partner or not, excluding those with a prior stroke at inclusion. We used the logrank test to identify a trend in ischaemic stroke incidence according to income level. In the multivariable analysis, we dichotomised the income variable defining high income as reporting 2,200€ or more per month. We used Cox proportional hazards modelling to estimate the association between income and ischaemic stroke risk, and to examine whether this association was affected by other social, behavioural and biological risk factors. Since results did not differ by sex in the multivariable analysis, we combined men and women so as to increase the precision of the estimates. All analyses were performed with Stata v 10.2 (StataCorp LP, TX, USA).

## Results

Of the 9,294 participants, 8,676 (93%) provided information on household income. As income levels increased, participants were more often male, younger, better educated and more often living with a partner (Table 1). Those not living with a partner were either living alone (49% in the low-income group, versus 13% in the high-income group) or sharing accommodation with a relative (5 versus 2%,  $P < 10^{-3}$ ). There were significant differences between higher and lower income participants regarding biological cardiovascular risk factors. The prevalence of high blood pressure and diabetes decreased as income increased. Given the presence of hypertension, receiving antihypertensive

treatment was more frequent in the low-income group. Lower income participants were more likely to be overweight, but alcohol consumption and smoking were more frequent among the more wealthy participants. There was a moderate but statistically significant downward trend in history of coronary event as income increased, but none for history of stroke.

After exclusion of 270 individuals (3%) who declared a history of stroke at baseline and of a further 337 subjects (4%) who had missing follow-up data, 8,644 participants were involved in the longitudinal, prospective analysis. During the 6-year follow-up period, 180 subjects had a first ever stroke (incidence rate: 4.3 per 1,000 py, 95% CI: 3.7–5), 136 of which (76%) were ischaemic strokes (incidence rate: 3.2 per 1,000 py, 95% CI: 2.7–3.8). Ischaemic stroke incidence in women was nearly half the level in men (age-adjusted rate ratio: 0.57, 95% CI 0.40–0.80). There was a statistically significant trend of increasing incidence as level of income increased from 2.42 to 4.11 per 1,000 py (logrank test for trend:  $P = 0.04$ ), although incidence did not gradually increase from the second to the third income groups (Table 2). No association was observed between ischaemic stroke incidence and either education level or living in a couple. There were eight fatal ischaemic strokes and the case fatality was 5% (3/58) in the highest income group compared with 7% (5/68) in all other participants ( $P = 0.72$ ).

Table 3 summarises the results of the multivariable analysis investigating the potential effects of known risk factors on the association between ischaemic stroke

**Table 1.** Sociodemographic characteristics and risk factors frequencies according to income level

| Monthly household income             | <750€<br><i>n</i> = 516 | 750–1,500€<br><i>n</i> = 2,711 | 1,500–2,200€<br><i>n</i> = 2,449 | >2,200€<br><i>n</i> = 3,000 | <i>P</i> (trend) |
|--------------------------------------|-------------------------|--------------------------------|----------------------------------|-----------------------------|------------------|
| Sociodemographic characteristics (%) |                         |                                |                                  |                             |                  |
| Male                                 | 14                      | 25                             | 43                               | 55                          | $<10^{-3}$       |
| Age (mean)                           | 75.3                    | 74.9                           | 73.8                             | 73.5                        | $<10^{-3}$       |
| Living with partner                  | 10                      | 34                             | 68                               | 86                          | $<10^{-3}$       |
| High education                       | 6                       | 6                              | 14                               | 38                          | $<10^{-3}$       |
| Behavioural risk factors (%)         |                         |                                |                                  |                             |                  |
| BMI >25 kg/m <sup>2</sup>            | 59                      | 54                             | 53                               | 50                          | $<10^{-3}$       |
| Smoking (former or current)          | 24                      | 29                             | 42                               | 48                          | $<10^{-3}$       |
| Alcohol consumption (>20 g/day)      | 11                      | 18                             | 27                               | 32                          | $<10^{-3}$       |
| Biological risk factors (%)          |                         |                                |                                  |                             |                  |
| High blood pressure                  | 69                      | 65                             | 60                               | 58                          | $<10^{-3}$       |
| Atrial fibrillation <sup>a</sup>     | 1.08                    | 2.49                           | 2.18                             | 2.76                        | 0.16             |
| Diabetes                             | 13                      | 11                             | 11                               | 9                           | 0.001            |
| High blood cholesterol               | 55                      | 60                             | 57                               | 55                          | 0.002            |
| Good or very good self-rated health  | 44                      | 53                             | 61                               | 66                          | $<10^{-3}$       |
| Medical history (%)                  |                         |                                |                                  |                             |                  |
| Coronary event                       | 16                      | 12                             | 10                               | 12                          | 0.03             |
| Stroke                               | 3.3                     | 2.9                            | 2.6                              | 3.2                         | 0.84             |
| Medication use                       |                         |                                |                                  |                             |                  |
| Antihypertensive                     | 83                      | 83                             | 82                               | 77                          | $<10^{-3}$       |
| Aspirin                              | 21                      | 17                             | 18                               | 20                          | 0.05             |

All % exclude missing records.

<sup>a</sup>Information missing for 1,414 participants.

incidence and income level dichotomised as high (>2,200€ per month) versus low. As mentioned above, we performed multivariable analysis on the total population (panel on the left of the table) and on the restricted sample of participants living with a partner (right-hand side panel) as a further validation step. The results suggest a statistically significant 70% increased risk of ischaemic stroke with higher income. Adjustment for risk factors only marginally modified this association.

**Discussion**

In this prospective study on a sample of French non-institutionalised older people, we found a substantial increase (70%) of ischaemic stroke incidence among participants with the highest income compared with the rest of

the sample. Among the strengths of this study was the ability to consider ischaemic, as opposed to all strokes and to adjust for cardiovascular risk factors. The results are compatible with the existence of an increasing trend of ischaemic stroke incidence with increasing level of income. The high level of follow-up and a thorough ascertainment of events contribute to the validity of this study.

This finding is the opposite to what is seen in younger populations [3, 16] and raises a number of questions, some of which relate to specific features of the 3C study. First, the 37% acceptance rate at inception of the cohort questions the ability of the sample to fairly represent the general population. Compared with the 1999 population census, 3C participants were younger, more often born in France (94 versus 82%,  $P < 10^{-3}$ ) and had more often been to university (23 versus 16%,  $P < 10^{-3}$ ). This suggests an overrepresentation of individuals of high SES in the sample. Healthy volunteering is likely to have been an important factor influencing acceptance and this could in part explain why stroke incidence among the 3C participants of Dijon is approximately 30% lower than that measured in 1995–97 in the Dijon population-based stroke register [9]. What is critical for the interpretation of our findings however, is whether healthy volunteering affected acceptance differentially between income groups leading to, for example, the enrolment of a higher proportion of less healthy high-income individuals.

Although we cannot rule out that such a selection process has occurred, several arguments plead against it as a major or sole explanation to our findings. First, low-income participants displayed, as would be expected, a less favourable cardiovascular risk profile, including significantly higher frequencies of prior coronary events, higher prevalence of high blood pressure and diabetes (Table 1). Second, their overall health level, as reflected by self-rated health, was lower than that of higher income participants. Lastly, and more importantly, low income (<2,200€) was associated with a significantly

**Table 2.** Ischaemic stroke incidence (per 1,000 person-years) by socioeconomic status

|                                       | <i>n</i> | Person-years | Incidence rate <sup>a</sup> (95% CI) | Hazard ratio <sup>a</sup> (95% CI) |
|---------------------------------------|----------|--------------|--------------------------------------|------------------------------------|
| .....                                 |          |              |                                      |                                    |
| Monthly household income <sup>b</sup> |          |              |                                      |                                    |
| <750€                                 | 5        | 2,179        | 2.42 (0.00–5.27)                     | 1.00                               |
| 750–1,500€                            | 35       | 12,299       | 2.89 (1.19–3.92)                     | 1.33 (0.52–3.42)                   |
| 1,500–2,200€                          | 28       | 11,242       | 2.49 (1.57–3.42)                     | 1.16 (0.44–3.04)                   |
| >2,200€                               | 58       | 13,784       | 4.11 (2.97–5.25)                     | 1.89 (0.74–4.82)                   |
| Education level                       |          |              |                                      |                                    |
| No education                          | 14       | 3,959        | 3.36 (1.57–5.15)                     | 1.00                               |
| Intermediate                          | 92       | 29,793       | 3.14 (2.50–3.79)                     | 0.92 (0.52–1.62)                   |
| High education                        | 30       | 8,187        | 3.32 (2.07–4.57)                     | 1.00 (0.52–1.89)                   |
| Living with partner                   |          |              |                                      |                                    |
| No                                    | 48       | 16,675       | 3.25 (2.12–4.37)                     | 1.00                               |
| Yes                                   | 88       | 25,326       | 3.59 (2.76–4.42)                     | 1.22 (0.82–1.81)                   |

<sup>a</sup>Adjusted for age and sex.

<sup>b</sup>Total number of events amounts to 126 because of missing household income data.

**Table 3.** Association between income level and ischaemic stroke risk

|                                                    | All participants        |                  | Participants living with partner |                  |
|----------------------------------------------------|-------------------------|------------------|----------------------------------|------------------|
|                                                    | Low income <sup>a</sup> | High income      | Low income <sup>a</sup>          | High income      |
| <i>n</i>                                           | 5,285                   | 2,802            | 2,436                            | 2,414            |
| Number of strokes                                  | 68                      | 58               | 30                               | 51               |
| .....                                              |                         |                  |                                  |                  |
| Hazard ratio (95% CI)                              |                         |                  |                                  |                  |
| Adjusted for age, sex and educational level        | 1                       | 1.68 (1.15–2.47) | 1                                | 1.67 (1.04–2.67) |
| Adjusted for biological risk factors <sup>b</sup>  | 1                       | 1.72 (1.17–2.53) | 1                                | 1.72 (1.08–2.76) |
| Adjusted for behavioural risk factors <sup>c</sup> | 1                       | 1.75 (1.19–2.58) | 1                                | 1.69 (1.05–2.73) |
| Adjusted for medication <sup>d</sup>               | 1                       | 1.69 (1.15–2.49) | 1                                | 1.65 (1.03–2.64) |
| Fully adjusted <sup>e</sup>                        | 1                       | 1.77 (1.20–2.61) | 1                                | 1.71 (1.06–2.74) |

Note: All hazard ratios are adjusted for age, sex and education level.

<sup>a</sup>Baseline category.

<sup>b</sup>Include high blood pressure, atrial fibrillation, diabetes and hypercholesterolaemia.

<sup>c</sup>Include smoking, alcohol consumption and overweight.

<sup>d</sup>Include antihypertensive and aspirin.

<sup>e</sup>Include all risk factors and medication use.

higher all causes mortality risk (age- and sex-adjusted hazards ratio: 1.22; 95% CI: 1.05–1.43). Therefore, the benefit of a lower incidence of ischaemic stroke did not translate into better survival.

This pattern of higher mortality among low-income participants raises then the question of competing risks. This would arise if a significant proportion of individuals from the lower income group dropped out from the cohort by death due to a disease which has similar risk factors but earlier onset than ischaemic stroke. Coronary heart diseases (CHDs) and tobacco-linked cancers, such as lung cancer, are likely candidates. Ninety-seven CHD deaths were recorded during follow-up of the study population and, although the risk estimates suggested a lower CHD mortality among the higher income group, this difference did not reach statistical significance (age- and sex-adjusted hazards ratio: 0.77, 95% CI 0.49–1.22). There was no statistically significant difference in mortality from lung cancer between the two income groups either ( $n = 44$  deaths, age- and sex-adjusted hazards ratio: 0.93; 95% CI 0.49–1.76). Competing risks may therefore contribute, but in our opinion, are unlikely to account for all the association identified between ischaemic stroke risk and higher household income.

Since identification of strokes relied on self-reporting our findings could result from a lower level of case ascertainment in the low-income groups. However, low-income (<2,200€) participants did not declared significantly less symptoms than those in the high-income group (respectively 4.2 and 4.8%,  $P = 0.28$ ), but their symptoms were less frequently confirmed as stroke case by the adjudication committee (34 versus 43%,  $P = 0.04$ ). The similar proportions of ischaemic stroke cases admitted to hospital (79 and 77%, respectively, in low- and high-income groups), suggesting comparable level of severity, are not in favour of significant under-ascertainment among the low-income group either.

An association between high stroke incidence and high SES was also found in two US studies [12, 17]. Both of them suggest that stroke incidence in high- and low-socioeconomic groups crosses over around the age of 75. Using this age threshold in our sample, we found no evidence of a cross over but a non-significant increase of the excess risk in the higher income group (age- and gender-adjusted hazards ratios, respectively, 1.47 and 1.64 before and after 75,  $P = 0.94$ ). Higher stroke mortality in low SES population has been shown below 65 years of age for the period 1970–90 in France [16]. One explanation for the absence of cross over in our study could therefore be that it had occurred at an earlier age (before or around 65) and that we were thus unable to detect it. The choice of outcomes (e.g. all strokes versus ischaemic strokes), as well as differences in background levels of risk factors prevalence and stroke incidence may also explain this discrepancy.

Why would stroke incidence in old age be associated with high SES remains a puzzling question. The

contribution of cardiovascular risk factors, which, in younger age groups, has been shown to explain a large amount of SES disparities [12, 18], does not seem to be of similar importance in old age. Variation in detection and management of these risk factors, particularly of high blood pressure, could determine incidence disparities. Although there is evidence in the 3C sample that hypertensive high-income participants were less often receiving treatments (–6%), this difference did not affect significantly the risk variations. A similar comment applies to atrial fibrillation which, although less frequent in the lowest income group (cf. Table 1), was evenly distributed after adjustment for age and gender. Known risk factors have been said to explain only 60% of attributable risk for stroke (compared with 90% for ischaemic heart disease) [19]. Self declared household income at age 65, a marker of long-life earning, is an unlikely direct causal factor. Which individual factor(s) or interaction(s) of genetic, environmental, behavioural, social and psychosocial determinants acted, and when over the lifecourse, to determine the difference we observed is therefore open to question.

The selective survival hypothesis, as suggested by Avendano *et al.* [12] may provide a potential explanation. Selective survival refers to the phenomenon whereby above an age threshold of around 75 years old, mortality of advantaged population rises faster so as to crossover that of disadvantaged populations [20]. A plausible biological explanation for this phenomenon is that a genetic determinant of longevity initially homogeneously distributed across populations, ends up being more prevalent among the disadvantaged at old age, once other factors have taken their toll [21]. Both materialist and psychosocial theories relating to health inequalities suggest that, due to the lack of resources, poor people are exposed to less healthy living environments and less able to avoid health risks or to adopt more healthy behaviours, through direct or indirect pathways [22]. If these pressures intervened during early and working life, observing participants over 65 years in a prospective study would result in studying ‘resistant poor’. The very low level of ischaemic stroke incidence observed in our study suggests the presence of resistance factors among low-income participants than susceptibility factors among the high-income group, which is what would be expected under the selective survival hypothesis.

Most work on health inequalities rightly concentrates on premature morbidity and mortality. Bearing in mind the overall challenge of understanding and tackling social health inequalities [22], this study highlights the merits of examining social distribution of specific diseases in older age and the potential of such analysis to raise questions about aetiological mechanisms. From a clinical point of view, the implication of this finding is that, despite their more favourable cardiovascular risk factor profile, specific attention should be paid towards ischaemic stroke risk amongst affluent seniors.

## Key points

- Like most other diseases, stroke follows a social gradient with higher levels of morbidity and mortality identified among lower socioeconomic status population;
- However, most strokes occur after 65 years of age and less is known about the social gradient of stroke, and of its types;
- In this sample of non-institutionalised older people, ischaemic stroke incidence was significantly higher among participants with competing risks and survival selection may explain this unexpected finding.

## Conflict of interest

None declared.

## Funding

The Three-City Study is supported by a partnership agreement between the Institut National de la Santé et de la Recherche Médicale (INSERM), the Victor Segalen-Bordeaux II University and Sanofi-Aventis. The Fondation pour la Recherche Médicale funded the preparation and initiation of the study. The 3C Study is also supported by the Caisse Nationale Maladie des Travailleurs Salariés, the Direction Générale de la Santé, the Mutuelle Générale de l'Éducation Nationale, the Institut de la Longévité, the Conseils Régionaux of Aquitaine and Bourgogne, the Fondation de France and the Ministry of Research-INSERM Programme 'Cohortes et collections de données biologiques'.

## References

1. Mathers CD, Loncar D. Projections of global mortality and burden of disease from 2002 to 2030. *PLoS Med* 2006; 3: e442.
2. Di Carlo A. Human and economic burden of stroke. *Age Ageing* 2009; 38: 4–5.
3. Cox AM, McKeivitt C, Rudd AG, Wolfe CD. Socioeconomic status and stroke. *Lancet Neurol* 2006; 5: 181–8.
4. McFadden E, Luben R, Wareham N, Bingham S, Khaw KT. Social class, risk factors, and stroke incidence in men and women: a prospective study in the European Prospective Investigation in to Cancer in Norfolk Cohort. *Stroke* 2009; 40: 1070–7.
5. Mackenbach JP, Stirbu I, Roskam AJ *et al.* Socioeconomic inequalities in health in 22 European countries. *N Engl J Med* 2008; 358: 2468–81.
6. Dalstra JA, Kunst AE, Borrell C *et al.* Socioeconomic differences in the prevalence of common chronic diseases: an overview of eight European countries. *Int J Epidemiol* 2005; 34: 316–26.

7. Huisman M, Kunst AE, Andersen O *et al.* Socioeconomic inequalities in mortality among elderly people in 11 European populations. *J Epidemiol Community Health* 2004; 58: 468–75.
8. Sulander T, Rahkonen O, Nummela O, Uutela A. Ten year trends in health inequalities among older people, 1993–2003. *Age Ageing* 2009; 38: 613–7.
9. Wolfe CD, Giroud M, Kolominsky-Rabas P *et al.* Variations in stroke incidence and survival in 3 areas of Europe. European Registries of Stroke (EROS) Collaboration. *Stroke* 2000; 31: 2074–9.
10. Avendano M, Kunst AE, Huisman M *et al.* Educational level and stroke mortality: a comparison of 10 European populations during the 1990s. *Stroke* 2004; 35: 432–7.
11. Avendano M, Glymour MM. Stroke disparities in older Americans: is wealth a more powerful indicator of risk than income and education? *Stroke* 2008; 39: 1533–40.
12. Avendano M, Kawachi I, van Lenthe F *et al.* Socioeconomic status and stroke incidence in the US elderly: the role of risk factors in the EPESE study. *Stroke* 2006; 37: 1368–73.
13. Zia E, Hedblad B, Pessah-Rasmussen H, Berglund G, Janzon L, Engstrom G. Blood pressure in relation to the incidence of cerebral infarction and intracerebral hemorrhage. Hypertensive hemorrhage: debated nomenclature is still relevant. *Stroke* 2007; 38: 2681–5.
14. Sudlow C, Martinez Gonzalez NA, Kim J, Clark C. Does apolipoprotein E genotype influence the risk of ischemic stroke, intracerebral hemorrhage, or subarachnoid hemorrhage? Systematic review and meta-analyses of 31 studies among 5961 cases and 17,965 controls. *Stroke* 2006; 37: 364–70.
15. Santhosh J. Vascular factors and risk of dementia: design of the Three-City Study and baseline characteristics of the study population. *Neuroepidemiology* 2003; 22: 316–25.
16. Lang T, Ducimetiere P. Premature cardiovascular mortality in France: divergent evolution between social categories from 1970 to 1990. *Int J Epidemiol* 1995; 24: 331–9.
17. Lisabeth LD, Diez Roux AV, Escobar JD, Smith MA, Morgenstern LB. Neighborhood environment and risk of ischemic stroke: the brain attack surveillance in Corpus Christi (BASIC) Project. *Am J Epidemiol* 2007; 165: 279–87.
18. Hart CL, Hole DJ, Smith GD. The contribution of risk factors to stroke differentials, by socioeconomic position in adulthood: the Renfrew/Paisley Study. *Am J Public Health* 2000; 90: 1788–91.
19. Donnan GA, Fisher M, Macleod M, Davis SM. *Stroke*. *Lancet* 2008; 371: 1612–23.
20. Markides KS, Machalek R. Selective survival, aging and society. *Arch Gerontol Geriatr* 1984; 3: 207–22.
21. Liu X, Witten M. A biologically based explanation for mortality crossover in human populations. *Gerontologist* 1995; 35: 609–15.
22. Marmot M, Friel S, Bell R, Houweling TA, Taylor S. Closing the gap in a generation: health equity through action on the social determinants of health. *Lancet* 2008; 372: 1661–9.

Received 30 May 2010; accepted in revised form 26 August 2010
